# Supplementary material for: Piezophilic Phenotype Is Growth Condition Dependent and Correlated with the Regulation of Two Sets of ATPase in Deep-Sea Piezophilic Bacterium Photobacterium profundum SS9
Source: MDPI journal article supplement (doi:10.3390/microorganisms11030637), 2023-03-02
Supplement: s1 [file s1]

**Piezophilic phenotype is growth condition dependent and correlated with the regulation of two sets of ATPase in deep-sea piezophilic bacterium *Photobacterium profundum* SS9**

An-qi Li<sup>1,2,3</sup>, Wei-jia Zhang<sup>3,4,5\*</sup>, Xue-gong Li<sup>3,4,5</sup>, Xu-chong Bao<sup>2,3</sup>, Xiao-qing Qi<sup>3,4,5</sup>, Long-Fei Wu<sup>4,6</sup> and Douglas Bartlett<sup>7</sup>

- <sup>1</sup> Institute of Oceanology, Chinese Academy of Sciences, Qingdao 266071, China
- <sup>2</sup> University of Chinese Academy of Sciences, Beijing 101408, China
- <sup>3</sup> Laboratory of Deep-Sea Microbial Cell Biology, Institute of Deep-sea Science and Engineering, Chinese Academy of Sciences, Sanya 572000, China
- <sup>4</sup> International Associated Laboratory of Evolution and Development of Magnetotactic Multicellular Organisms, CNRS-Marseille/CAS-Sanya, Sanya 572000, China
- <sup>5</sup> Institution of Deep-sea Life Sciences, IDSSE-BGI, Hainan Deep-sea Technology Laboratory, Sanya 572000, China
- <sup>6</sup> LCB, Aix Marseille University and CNRS, 13402 Marseille, France
- <sup>7</sup> Marine Biology Research Division, Scripps Institution of Oceanography, University of California San Diego, La Jolla, CA 92093, USA

\* Correspondence: Dr. Wei-Jia Zhang; E-mail: wzhang@idsse.ac.cn; Tel: +86 898 8821 1771.  
Laboratory of Deep-Sea microbial cell biology, Institute of Deep-sea Science and Engineering, Chinese Academy of Sciences, Sanya, Hainan 572000, China.

**Keywords:** Deep-sea bacterium; high hydrostatic pressure; piezophilic, ATPase; energy metabolism

**Table S1.** Primers used in this study

| Name       | Sequence (5'-3')                   | Description              |
|------------|------------------------------------|--------------------------|
| I-up-F     | CGAGCTCTATTTAGCCCTCGCTGGTG         | Deletion of <i>atpI</i>  |
| Fusion-I-R | CAGCCATAACTCATCGTATTCGTTCCCTCG     | Deletion of <i>atpI</i>  |
| Fusion-I-F | CGAGGAACGAATACGATGAGTTATGGCTG      | Deletion of <i>atpI</i>  |
| I-down-R   | TGCTCTAGAGTACCAAGGGAAGCAAG         | Deletion of <i>atpI</i>  |
| SE1-up-F   | CCCCCGGGAGTTATCTTATTTGCCATTGTTTAC  | Deletion of <i>atpE1</i> |
| SE1-up-R   | TGCTCTAGATATCTCCAGTTTATAGTTGTCGGC  | Deletion of <i>atpE1</i> |
| SE1-d-F    | TGCTCTAGATCAATAGCTGTTTTAACCTTGTGG  | Deletion of <i>atpE1</i> |
| SE1-d-R    | TCCCCGCGGCACTGCAATTCAGCTTAACTTTACG | Deletion of <i>atpE1</i> |
| SE2-up-F   | CCCCCGGGAATAAGAGTCACTAGAACGGTCAAG  | Deletion of <i>atpE2</i> |
| SE2-up-R   | TGCTCTAGAAATTTTTTATAAATTAAATTAACG  | Deletion of <i>atpE2</i> |
| SE2-d-F    | TGCTCTAGATAAATGACTACTGCGGTGATACAG  | Deletion of <i>atpE2</i> |
| SE2-d-R    | TCCCCGCGGACTCAACAGTGCGAGAAAG       | Deletion of <i>atpE2</i> |
| Q-I-F      | TTAATCGGTGGTGGCATC                 | RT-PCR analysis          |
| Q-I-R      | GGTCAGTTTGAGGGGAAC                 | RT-PCR analysis          |
| Q-E1-F     | GTTTCGCTCTTCTTGGTGG                | RT-PCR analysis          |
| Q-E1-R     | AGCTAGCTGGGCAACAAATG               | RT-PCR analysis          |
| Q-E2-F     | ACGTTGCTGGCGCAC                    | RT-PCR analysis          |
| Q-E2-R     | TACCAACACCGATCATTGG                | RT-PCR analysis          |
| G3PDH-F    | CGGCCTTCTAACAGGTATGG               | RT-PCR analysis          |
| G3PDH-R    | AGTTAGCGCAACACCAGC                 | RT-PCR analysis          |

**Table S2.** The genetic characterization of ATPase components in SS9 strain

|             | ATPase-I   |                      | ATPase-II  |                      | Gene product       | Similarity in amino acid sequences (%) |
|-------------|------------|----------------------|------------|----------------------|--------------------|----------------------------------------|
|             | Gene locus | Length (amino acids) | Gene locus | Length (amino acids) |                    |                                        |
| <i>atpI</i> | PBPRA3611  | 129                  | -          | -                    | Subunit I          | -                                      |
| <i>atpB</i> | PBPRA3610  | 262                  | PBPRB0130  | 255                  | Subunit a          | 55.73                                  |
| <i>atpE</i> | PBPRA3609  | 86                   | PBPRB0131  | 82                   | Subunit c          | 44.74                                  |
| <i>atpF</i> | PBPRA3608  | 156                  | PBPRB0132  | 134                  | Subunit b          | 57.48                                  |
| <i>atpH</i> | PBPRA3607  | 177                  | PBPRB0133  | 182                  | Subunit $\delta$   | 44.51                                  |
| <i>atpA</i> | PBPRA3606  | 513                  | PBPRB0134  | 513                  | Subunit $\alpha$   | 82.85                                  |
| <i>atpG</i> | PBPRA3605  | 288                  | PBPRB0135  | 291                  | Subunit $\gamma$   | 68.49                                  |
| <i>atpD</i> | PBPRA3604  | 468                  | PBPRB0136  | 461                  | Subunit $\beta$    | 83.12                                  |
| <i>atpC</i> | PBPRA3603  | 140                  | PBPRB0137  | 147                  | Subunit $\epsilon$ | 58.39                                  |

**Table S3.** The growth characteristics of wild-type and mutant strains in MB2216 and MG media

|                                  | MB2216 medium |             |                                |             | MG medium    |             |                                |             |
|----------------------------------|---------------|-------------|--------------------------------|-------------|--------------|-------------|--------------------------------|-------------|
|                                  | $\mu_{\max}$  |             | Biomass (OD <sub>600nm</sub> ) |             | $\mu_{\max}$ |             | Biomass (OD <sub>600nm</sub> ) |             |
|                                  | 0.1 MPa       | 28 MPa      | 0.1 MPa                        | 28 MPa      | 0.1 MPa      | 28 MPa      | 0.1 MPa                        | 28 MPa      |
| <b>WT</b>                        | 0.25 ± 0.00   | 0.25 ± 0.00 | 0.19 ± 0.01                    | 0.30 ± 0.02 | 0.04 ± 0.00  | 0.10 ± 0.01 | 0.42 ± 0.01                    | 0.54 ± 0.01 |
| <i><math>\Delta atpI</math></i>  | 0.26 ± 0.03   | 0.31 ± 0.02 | 0.18 ± 0.00                    | 0.35 ± 0.00 | 0.03 ± 0.00  | 0.12 ± 0.01 | 0.61 ± 0.01                    | 0.75 ± 0.02 |
| <i><math>\Delta atpE1</math></i> | 0.22 ± 0.01   | 0.28 ± 0.00 | 0.15 ± 0.01                    | 0.34 ± 0.01 | 0.02 ± 0.00  | 0.08 ± 0.00 | 0.59 ± 0.00                    | 0.66 ± 0.01 |
| <i><math>\Delta atpE2</math></i> | 0.29 ± 0.01   | 0.33 ± 0.00 | 0.20 ± 0.01                    | 0.30 ± 0.01 | 0.03 ± 0.01  | 0.19 ± 0.01 | 0.43 ± 0.01                    | 0.60 ± 0.01 |

**Table S4.** Effect of pressure on the expression of ATPase genes

|        |              | WT                           | $\Delta atpI$              | $\Delta atpE1$            | $\Delta atpE2$             |
|--------|--------------|------------------------------|----------------------------|---------------------------|----------------------------|
|        | <i>atpI</i>  | 1.47 ± 0.08 <sup>#, **</sup> | -                          | 1.35 ± 0.25               | 0.74 ± 0.13 <sup>***</sup> |
| MB2216 | <i>atpE1</i> | 0.90 ± 0.07                  | 1.50 ± 0.13 <sup>**</sup>  | -                         | 0.97 ± 0.02                |
|        | <i>atpE2</i> | 1.22 ± 0.11                  | 0.81 ± 0.10 <sup>*</sup>   | 1.35 ± 0.20 <sup>*</sup>  | -                          |
|        | <i>atpI</i>  | 0.26 ± 0.01 <sup>***</sup>   | -                          | 1.95 ± 0.16 <sup>**</sup> | 0.45 ± 0.04 <sup>***</sup> |
| MG     | <i>atpE1</i> | 0.40 ± 0.01 <sup>***</sup>   | 0.92 ± 0.03                | -                         | 0.43 ± 0.05 <sup>***</sup> |
|        | <i>atpE2</i> | 1.32 ± 0.14                  | 1.68 ± 0.04 <sup>***</sup> | 0.86 ± 0.05               | -                          |

<sup>#</sup> The values show the relative expression at 28 MPa normalized to that at 0.1 MPa.

All data are shown as mean ± standard deviation. The statistical analysis of comparisons between two groups was performed using an unpaired-sample *t* test, a two-tailed *p* < 0.05 was considered significant, \*, *p* < 0.05; \*\*, *p* < 0.01; \*\*\*, *p* < 0.001.

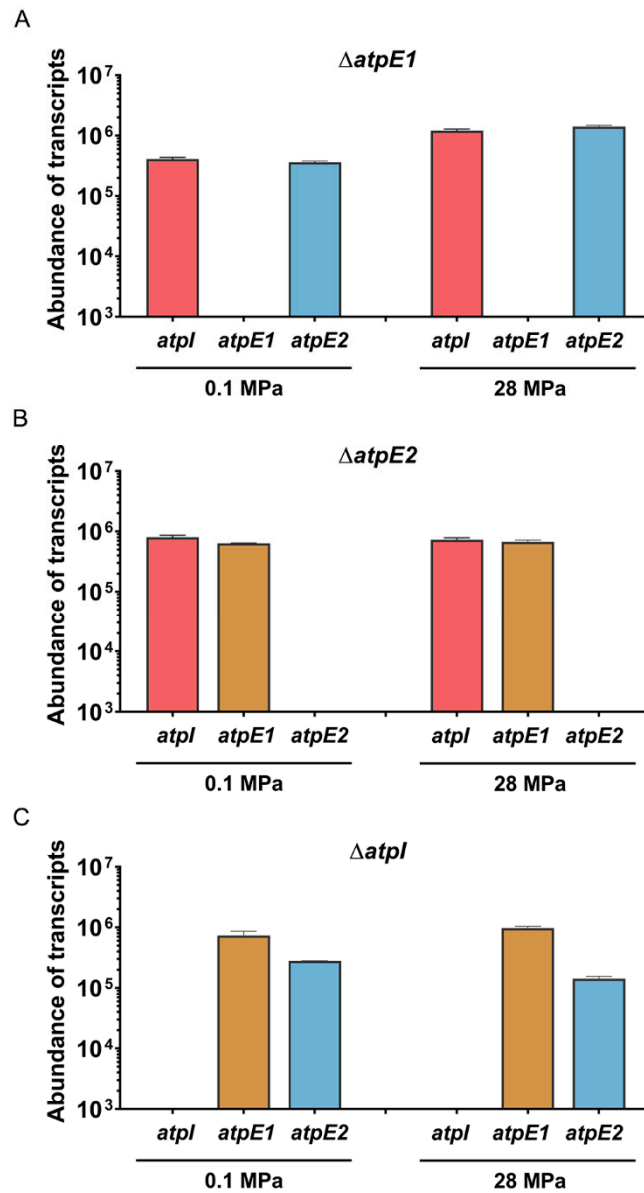

**Figure S1.** Abundance of ATPase gene transcripts in mutant strains grown in MB2216 medium. Panel A, B and C show the quantification of ATPase genes in  $\Delta atpE1$ ,  $\Delta atpE2$  and  $\Delta atpI$  mutants, respectively. The genes analyzed and pressure condition are marked below the bars.

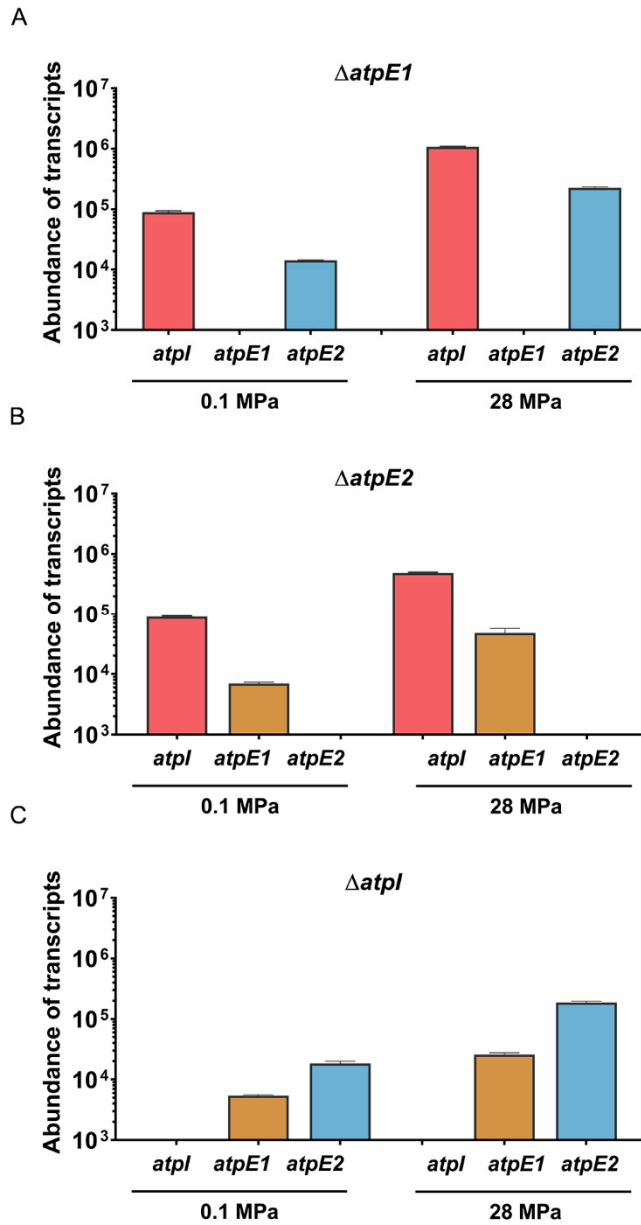

**Figure S2.** Abundance of ATPase gene transcripts in mutant strains grown in MG medium. Panel A, B and C show the quantification of ATPase genes in  $\Delta atpE1$ ,  $\Delta atpE2$  and  $\Delta atpI$  mutants, respectively. The genes analyzed and pressure condition are marked below the bars.
